# Supplementary material for: Parent and nano-encapsulated ytterbium(iii) complex toward binding with biological macromolecules, in vitro cytotoxicity, cleavage and antimicrobial activity studies
Source: Royal Society of Chemistry journal article supplement (doi:10.1039/d0ra03895d), 2020-01-01
Supplement: d0ra03895d1.pdf [file d0ra03895d1.pdf]

**Parent and nano-encapsulated ytterbium(III) complex toward binding with biological macromolecules, *in vitro* cytotoxicity, cleavage and antimicrobial activity studies**

Zahra Aramesh-Boroujeni\*<sup>a,b</sup>, Shohreh Jahani<sup>c</sup>, Mozhgan Khorasani-Motlagh<sup>d</sup>, Kagan Kerman<sup>e</sup>  
and Meissam Noroozifar\*<sup>e</sup>

<sup>a</sup> *Department of Clinical Laboratory, AlZahra Hospital, Isfahan University of Medical Sciences, Isfahan, Iran*

<sup>b</sup> *Young Researchers and Elite Club, Najafabad Branch, Islamic Azad University, Najafabad, Isfahan, Iran*

<sup>c</sup> *Nano Bioelectrochemistry Research Center, Bam University of Medical Sciences, Bam, Iran*

<sup>d</sup> *Department of Chemistry, University of Sistan and Baluchestan, Zahedan 98135-674, Iran*

<sup>e</sup> *Department of Physical and Environmental Sciences, University of Toronto Scarborough 1265 Military Trail, Toronto, Ontario, M1C 1A4, Canada*

\* *Corresponding authors, E-mail: [zaramesh.boroujeni@gmail.com](mailto:zaramesh.boroujeni@gmail.com) (Z. Aramesh-Boroujeni) and E-mail: [m.noroozifar@utoronto.ca](mailto:m.noroozifar@utoronto.ca) (M. Noroozifar).*

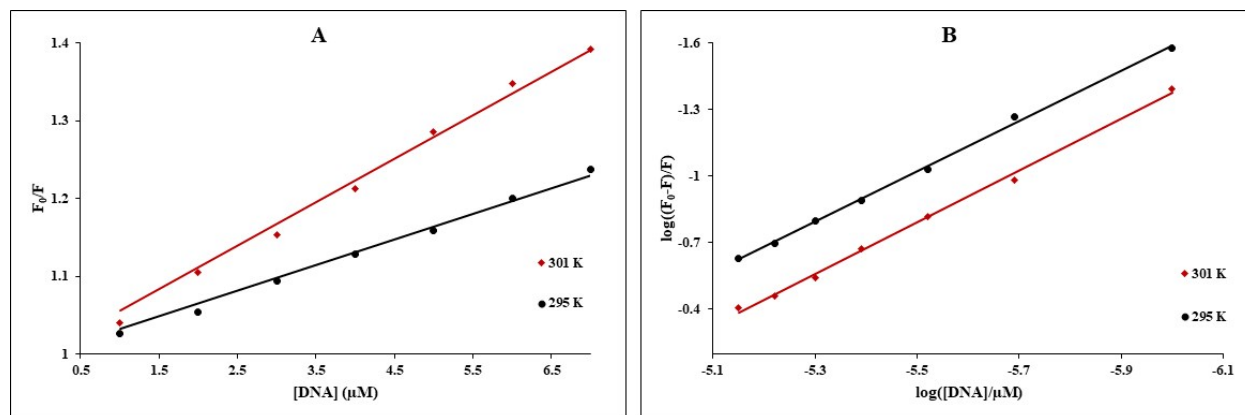

**Fig. S1** (A) Stern–Volmer curves for the binding of Yb complex with DNA at 295 and 301 K, (B) The plot of  $\log((F_0-F)/F)$  against  $\log([DNA]/\mu M)$  at 295 and 301 K ( $[DNA]= 0$  to  $14.3 \mu M$  and  $[Complex]= 0.1 \mu M$ ).

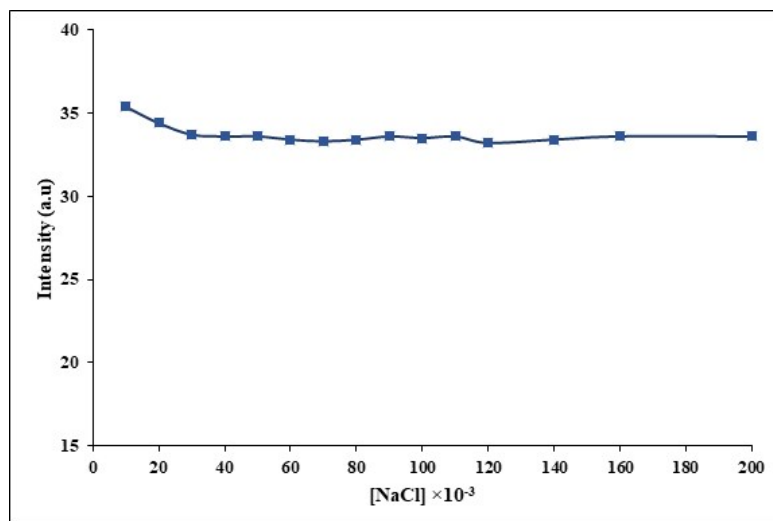

**Fig. S2** The influence of sodium chloride (0.05 to 0.6 M) on the emission of the Yb complex in the existence of FS-DNA ( $4.4 \mu M$ ).

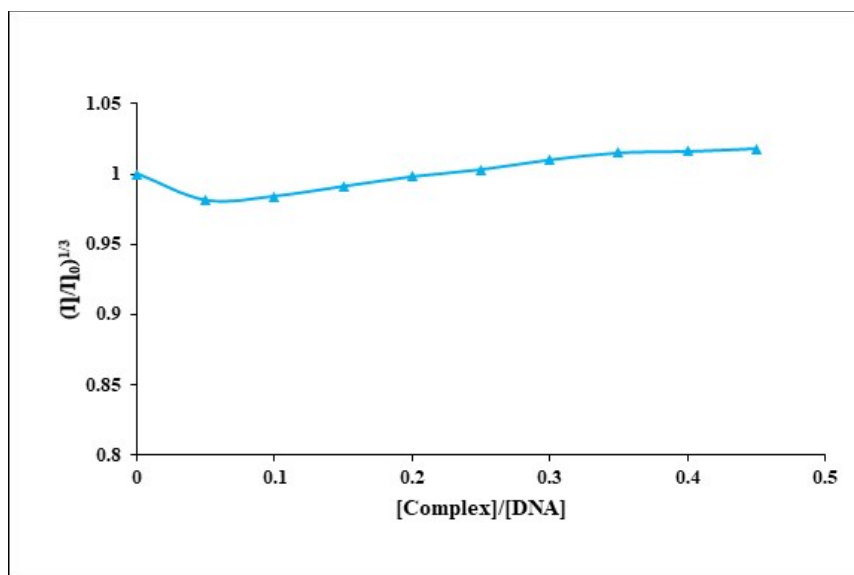

**Fig. S3** Effect of enhancing amounts of Yb complex on the FS- DNA viscosity,  $[\text{Complex}] = 2.0 \times 10^{-5} \text{ M}$  and  $[\text{DNA}] = 5.9 \text{ mM}$ .

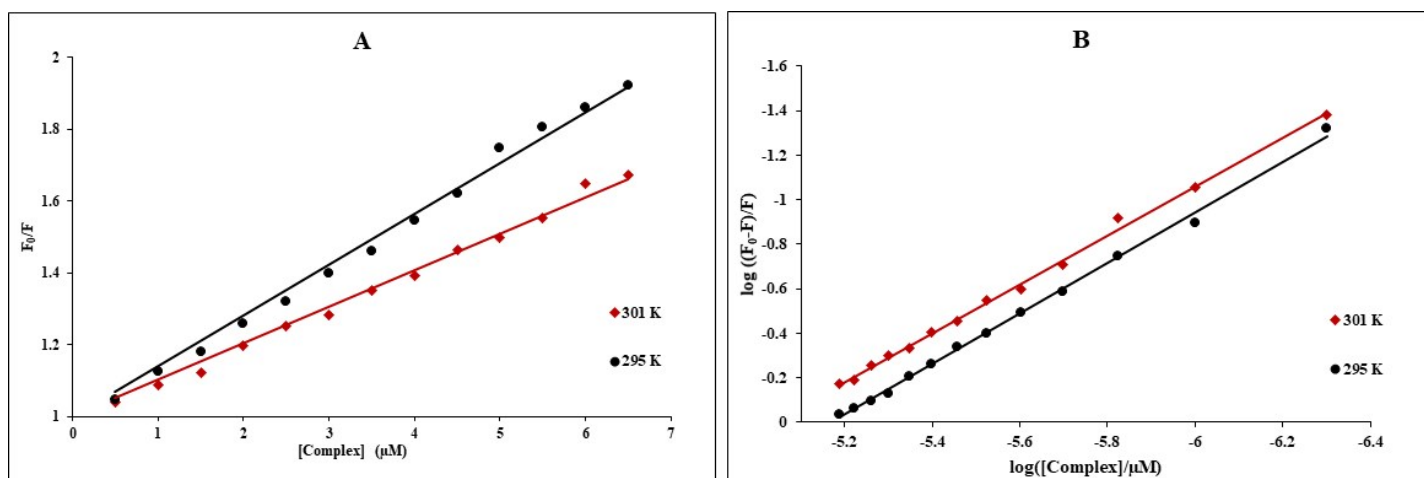

**Fig. S4** (A) Stern–Volmer curves for the binding of Yb complex with BSA at 295 and 301 K, (B) The plot of  $\log((F_0-F)/F)$  against  $\log([\text{Complex}]/\mu\text{M})$  at 295 and 301 K ( $[\text{Complex}] = 0 - 6.0 \mu\text{M}$  and  $[\text{BSA}] = 3 \mu\text{M}$ ).

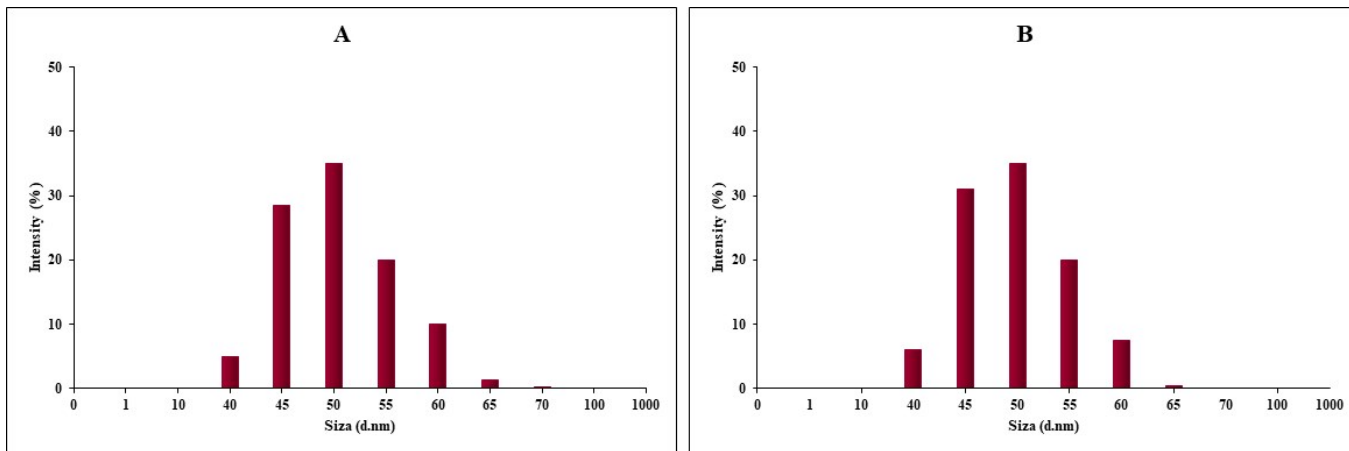

**Fig. S5** (A) and (B) zeta potential measurement of SNPE and LNPE, respectively.
